# Supplementary material for: The ribosomal protein S6 in renal cell carcinoma: functional relevance and potential as biomarker
Source: PubMed Central journal article supplement (PMC4808008; doi:10.18632/oncotarget.6225), 2015-10-25
Supplement: oncotarget-07-0418-s001.pdf [file oncotarget-07-0418-s001.pdf]

# The ribosomal protein S6 in renal cell carcinoma: functional relevance and potential as biomarker

## Supplementary Material

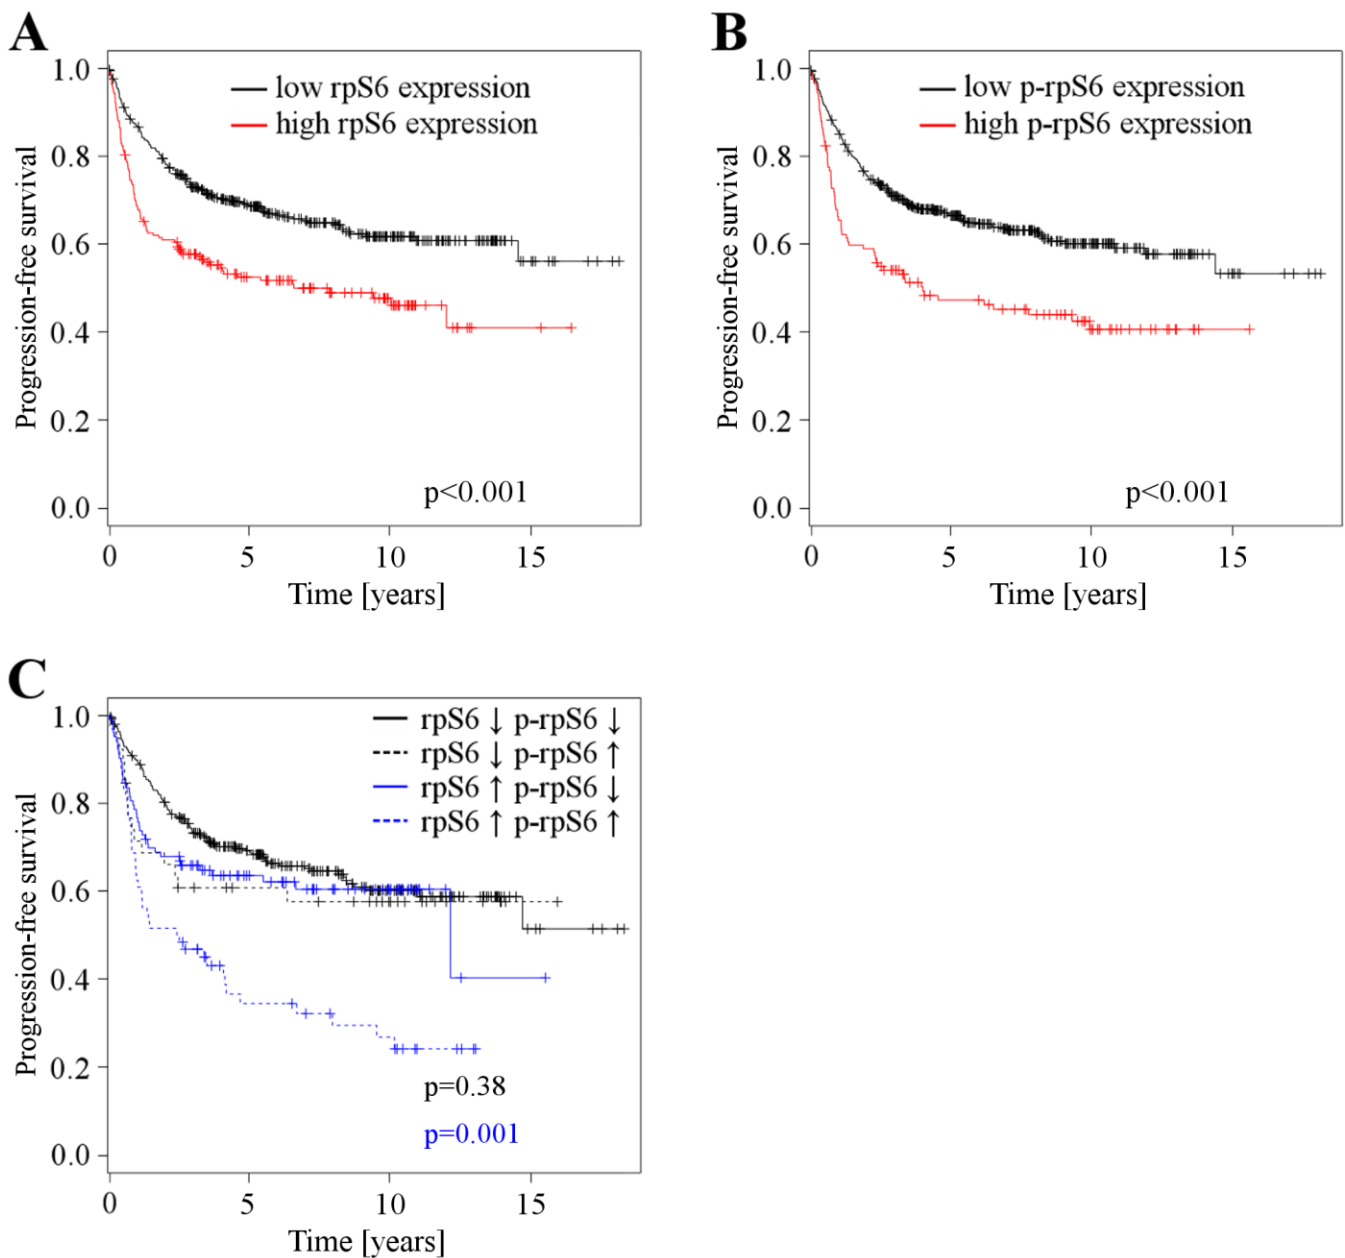

**Supplementary Figure 1** A: Progression free survival depending on rpS6 expression levels (n=580), patients with low rpS6 expression levels (n=387) vs. patients with high rpS6 expression levels (n=193). B: Progression free survival depending on p-rpS6 expression levels (n=598), patients with low p-rpS6 expression levels (n=473) vs. patients with high p-rpS6 expression levels (n=125). C: Progression free survival depending on p-rpS6 expression in patients with low (n=339) and high rpS6 (n=167) expression. Patients with low rpS6 expressing RCCs are further divided into groups with low (n=300) and high (n=39) p-rpS6 expression, the same partitioning is done for patients with high rpS6 expression: low p-rpS6 (n=103) and high p-rpS6 (n=64).

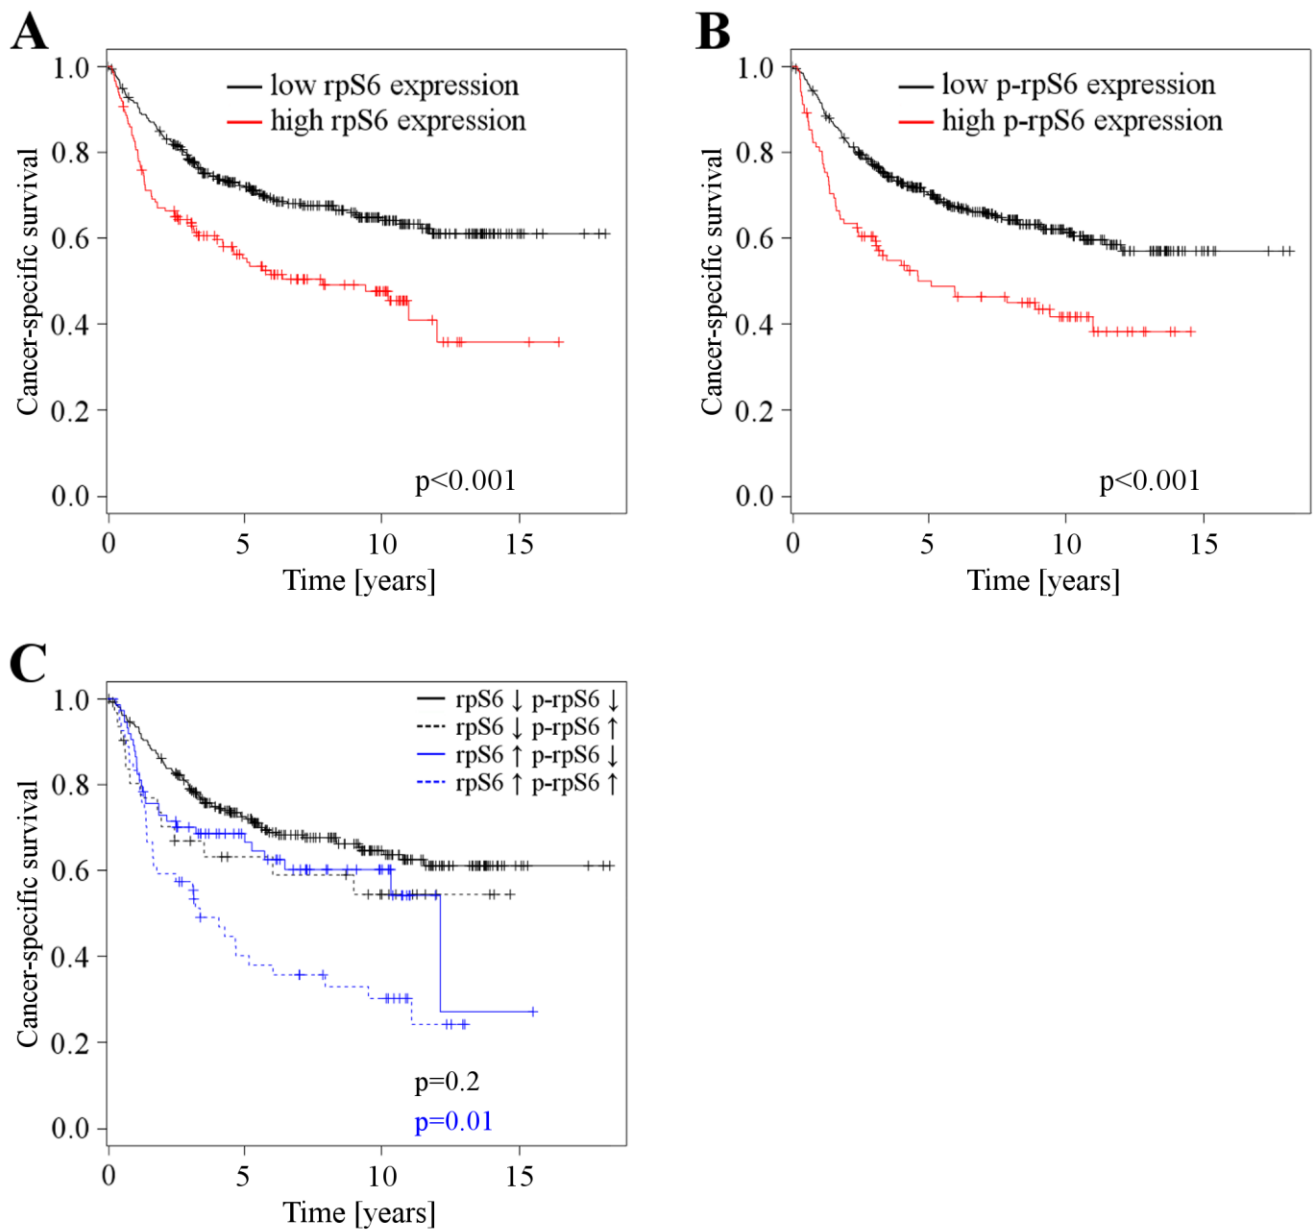

**Supplementary Figure 2** A: Cancer specific survival in patients with ccRCC depending on rpS6 expression levels (n=486), patients with low rpS6 expression levels (n=336) vs. patients with high rpS6 expression levels (n=150). B: Cancer specific survival in patients with ccRCC depending on p-rpS6 expression levels (n=496), patients with low p-rpS6 expression levels (n=394) vs. patients with high p-rpS6 expression levels (n=102). C: Cancer specific survival in patients with ccRCC depending on p-rpS6 expression in patients with low (n=294) and high rpS6 (n=128) expression. Patients with low rpS6 expressing RCCs are further divided into groups with low (n=263) and high (n=31) p-rpS6 expression, the same partitioning is done for patients with high rpS6 expression: low p-rpS6 (n=74) and high p-rpS6 (n=54).

**Suppl. Tab. 1: Comparison of rpS6 / p-rpS6 expression levels and clinical and pathologic features in patients with localized (M0) and metastasized (M1) RCC.**

| Feature                               | M0       |          |       |         |          |       | M1      |         |       |         |         |       |
|---------------------------------------|----------|----------|-------|---------|----------|-------|---------|---------|-------|---------|---------|-------|
|                                       | rpS6     |          | p     | p-rpS6  |          | p     | rpS6    |         | p     | p-rpS6  |         | p     |
| high                                  | low      | high     |       | low     | high     |       | low     | high    |       | low     |         |       |
|                                       | 147 (32) | 319 (68) |       | 92 (19) | 394 (81) |       | 46 (40) | 68 (60) |       | 33 (29) | 79 (71) |       |
| <b>Sex</b>                            |          |          | 1     |         |          | 0.723 |         |         | 1     |         |         | 0.259 |
| Male                                  | 86 (18)  | 186 (40) |       | 57 (12) | 234 (48) |       | 32 (28) | 47 (41) |       | 26 (23) | 52 (46) |       |
| Female                                | 61 (13)  | 133 (29) |       | 35 (7)  | 160 (33) |       | 14 (12) | 21 (18) |       | 7 (6)   | 27 (24) |       |
| <b>Age at surgery (y)</b>             |          |          | 0.761 |         |          | 0.814 |         |         | 0.693 |         |         | 0.286 |
| <65                                   | 86 (18)  | 192 (41) |       | 57 (12) | 238 (49) |       | 31 (27) | 43 (38) |       | 19 (17) | 54 (48) |       |
| >=65                                  | 61 (13)  | 127 (27) |       | 35 (7)  | 156 (32) |       | 15 (13) | 25 (22) |       | 14 (12) | 25 (22) |       |
| <b>Karnofsky index</b>                |          |          | 0.02  |         |          | 0.001 |         |         | 0.447 |         |         | 0.836 |
| >=1                                   | 52 (11)  | 79 (17)  |       | 41 (8)  | 102 (21) |       | 22 (19) | 38 (33) |       | 19 (17) | 43 (38) |       |
| <1                                    | 95 (20)  | 240 (52) |       | 51 (10) | 292 (60) |       | 24 (21) | 30 (26) |       | 14 (12) | 36 (32) |       |
| <b>Tumor extent</b>                   |          |          | 0.825 |         |          | 0.124 |         |         | 0.024 |         |         | 0.191 |
| pT1/2                                 | 107 (23) | 228 (49) |       | 60 (12) | 289 (59) |       | 9 (8)   | 28 (25) |       | 8 (7)   | 31 (28) |       |
| pT3/4                                 | 40 (9)   | 91 (20)  |       | 32 (7)  | 105 (22) |       | 37 (32) | 40 (35) |       | 25 (22) | 48 (43) |       |
| <b>Regional lymph node metastasis</b> |          |          | 0.219 |         |          | 0.006 |         |         | 0.093 |         |         | 0.154 |
| N0/pN0                                | 138 (30) | 308 (66) |       | 83 (17) | 383 (79) |       | 29 (25) | 53 (46) |       | 21 (19) | 62 (55) |       |
| pN1, pN2                              | 9 (2)    | 11 (2)   |       | 9 (2)   | 11 (2)   |       | 17 (15) | 15 (13) |       | 12 (11) | 17 (15) |       |
| <b>Grade of malignancy</b>            |          |          | 0.078 |         |          | 0.018 |         |         | 0.124 |         |         | 0.064 |
| G1/2                                  | 125 (27) | 290 (62) |       | 74 (15) | 355 (73) |       | 21 (18) | 42 (37) |       | 14 (12) | 49 (44) |       |
| G3/4                                  | 22 (5)   | 29 (6)   |       | 18 (4)  | 39 (8)   |       | 25 (22) | 26 (23) |       | 19 (17) | 30 (27) |       |
| <b>Type of surgery</b>                |          |          | 0.003 |         |          | 1     |         |         |       |         |         | 1     |
| Radical nephrectomy                   | 107 (23) | 271 (58) |       | 76 (16) | 323 (66) |       |         |         |       | 33 (29) | 78 (70) |       |
| Partial nephrectomy                   | 40 (9)   | 48 (10)  |       | 16 (3)  | 71 (15)  |       |         |         |       | 0 (0)   | 1 (1)   |       |
| <b>Histopathological subtype</b>      |          |          | 0.025 |         |          | 0.655 |         |         | 0.079 |         |         | 0.549 |
| Clear-cell                            | 113 (24) | 273 (59) |       | 74 (15) | 324 (67) |       | 37 (32) | 63 (55) |       | 28 (25) | 70 (62) |       |
| Non clear-cell                        | 34 (7)   | 46 (10)  |       | 18 (4)  | 70 (14)  |       | 9 (8)   | 5 (4)   |       | 5 (4)   | 9 (8)   |       |

**Suppl. Tab. 2: Comparison of rpS6 / p-rpS6 expression levels and clinical and pathologic features in patients with localized (N0) and lymph node-metastasized (N1/2) RCC.**

| Feature                          | M0     |         |       |        |         |       |          |          |       |         |          |       |
|----------------------------------|--------|---------|-------|--------|---------|-------|----------|----------|-------|---------|----------|-------|
|                                  | N1/2   |         |       |        |         |       | N0       |          |       |         |          |       |
|                                  | rpS6   |         | p     | p-rpS6 |         | p     | rpS6     |          | p     | p-rpS6  |          | p     |
| high                             | low    | high    |       | low    | high    |       | low      | high     |       | low     |          |       |
| <b>Sex</b>                       | 9 (45) | 11 (55) | 1     | 9 (45) | 11 (55) | 0.617 | 138 (31) | 308 (69) | 1     | 83 (18) | 383 (82) | 0.712 |
| Male                             | 6 (30) | 8 (40)  |       | 6 (30) | 9 (45)  |       | 80 (18)  | 178 (40) |       | 51 (11) | 225 (48) |       |
| Female                           | 3 (15) | 3 (15)  |       | 3 (15) | 2 (10)  |       | 58 (13)  | 130 (29) |       | 32 (7)  | 158 (34) |       |
| <b>Age at surgery (y)</b>        |        |         | 0.374 |        |         | 0.406 |          |          | 1     |         |          | 0.459 |
| <65                              | 2 (10) | 5 (25)  |       | 3 (15) | 6 (30)  |       | 84 (19)  | 187 (42) |       | 54 (12) | 232 (50) |       |
| >=65                             | 7 (35) | 6 (30)  |       | 6 (30) | 5 (25)  |       | 54 (12)  | 121 (27) |       | 29 (6)  | 151 (32) |       |
| <b>Karnofsky index</b>           |        |         | 0.175 |        |         | 0.362 |          |          | 0.066 |         |          | 0.002 |
| >=1                              | 6 (30) | 3 (15)  |       | 5 (25) | 3 (15)  |       | 46 (10)  | 76 (17)  |       | 36 (8)  | 99 (21)  |       |
| <1                               | 3 (15) | 8 (40)  |       | 4 (20) | 8 (40)  |       | 92 (21)  | 232 (52) |       | 47 (10) | 284 (61) |       |
| <b>Tumor extent</b>              |        |         | 1     |        |         | 0.285 |          |          | 0.561 |         |          | 0.217 |
| pT1/2                            | 2 (10) | 2 (10)  |       | 3 (15) | 1 (5)   |       | 105 (24) | 226 (51) |       | 57 (12) | 288 (62) |       |
| pT3/4                            | 7 (35) | 9 (45)  |       | 6 (30) | 10 (50) |       | 33 (7)   | 82 (18)  |       | 26 (6)  | 95 (20)  |       |
| <b>Grade of malignancy</b>       |        |         | 0.642 |        |         | 1     |          |          | 0.168 |         |          | 0.031 |
| G1/2                             | 5 (25) | 8 (40)  |       | 6 (30) | 8 (40)  |       | 120 (27) | 282 (63) |       | 68 (15) | 347 (74) |       |
| G3/4                             | 4 (20) | 3 (15)  |       | 3 (15) | 3 (15)  |       | 18 (4)   | 26 (6)   |       | 15 (3)  | 36 (8)   |       |
| <b>Type of surgery</b>           |        |         | 1     |        |         | 0.45  |          |          | 0.001 |         |          | 1     |
| Radical nephrectomy              | 9 (45) | 10 (50) |       | 8 (40) | 11 (55) |       | 98 (22)  | 261 (59) |       | 68 (15) | 312 (67) |       |
| Partial nephrectomy              | 0 (0)  | 1 (5)   |       | 1 (5)  | 0 (0)   |       | 40 (9)   | 47 (11)  |       | 15 (3)  | 71 (15)  |       |
| <b>Histopathological subtype</b> |        |         | 0.566 |        |         | 0.566 |          |          | 0.03  |         |          | 0.756 |
| Clear-cell                       | 7 (35) | 10 (50) |       | 7 (35) | 10 (50) |       | 106 (24) | 263 (59) |       | 67 (14) | 314 (67) |       |
| Non clear-cell                   | 2 (10) | 1 (5)   |       | 2 (10) | 1 (5)   |       | 32 (7)   | 45 (10)  |       | 16 (3)  | 69 (15)  |       |

**Suppl. Tab. 3: Uni- and multivariate analyses of rpS6 and p-rpS6 expression and clinical/pathologic features for the prediction of progression free survival in patients with RCCs.**

|                                             | M0+M1                    |                  |                          |                  | M0                       |              |                          |              | M1                       |                  |                          |                  |
|---------------------------------------------|--------------------------|------------------|--------------------------|------------------|--------------------------|--------------|--------------------------|--------------|--------------------------|------------------|--------------------------|------------------|
|                                             | Univariate Analysis      |                  | Multivariate Analysis    |                  | Univariate Analysis      |              | Multivariate Analysis    |              | Univariate Analysis      |                  | Multivariate Analysis    |                  |
|                                             | Hazard Ratio<br>(95% CI) | p                | Hazard Ratio<br>(95% CI) | p                | Hazard Ratio<br>(95% CI) | p            | Hazard Ratio<br>(95% CI) | p            | Hazard Ratio<br>(95% CI) | p                | Hazard Ratio<br>(95% CI) | p                |
| <b>rpS6 + p-rpS6 Expression*</b>            | 1.7 (1.3-2.2)            | <b>&lt;0.001</b> | 1.8 (1.3-2.4)            | <b>&lt;0.001</b> | 1.8 (1.2-2.5)            | <b>0.003</b> | 1.7 (1.1-2.6)            | <b>0.013</b> | 2.4 (1.5-3.7)            | <b>&lt;0.001</b> | 2.4 (1.6-3.9)            | <b>&lt;0.001</b> |
| Karnofsky*                                  | 1.9 (1.4-2.5)            | <b>&lt;0.001</b> | 1.3 (0.9-1.7)            | 0.128            | 1.4 (0.9-2)              | 0.097        | 1.3 (0.9-1.9)            | 0.244        | 1.2 (0.8-1.9)            | 0.378            | 1.4 (0.9-2.2)            | 0.17             |
| Tumor extent <sup>o</sup>                   | 2.4 (1.8-3.2)            | <b>&lt;0.001</b> | 1.4 (1-1.9)              | <b>0.032</b>     | 1.3 (0.9-1.9)            | 0.175        | 1.4 (0.9-2.1)            | 0.141        | 1.8 (1.1-2.8)            | <b>0.02</b>      | 1.5 (0.9-2.5)            | 0.122            |
| Regional lymph node metastasis <sup>•</sup> | 2.7 (1.9-3.9)            | <b>&lt;0.001</b> | 1.2 (0.8-1.7)            | 0.386            | 1.3 (0.8-2.3)            | 0.335        | 1.2 (0.7-2.1)            | 0.574        | 1.5 (0.9-2.3)            | 0.115            | 0.8 (0.5-1.4)            | 0.395            |
| Distant metastasis <sup>‡</sup>             | 77.4 (41.3-)             | <b>&lt;0.001</b> | 80.5 (40.9-)             | <b>&lt;0.001</b> |                          |              |                          |              |                          |                  |                          |                  |
| Grade of malignancy <sup>⊗</sup>            | 2.7 (2-3.6)              | <b>&lt;0.001</b> | 1.3 (0.9-1.8)            | 0.11             | 1.4 (0.9-2.1)            | 0.15         | 1 (0.6-1.6)              | 0.975        | 1.9 (1.2-2.9)            | <b>0.003</b>     | 1.8 (1.2-2.9)            | <b>0.009</b>     |
| Type of surgery t                           | 2 (1.1-3.7)              | <b>0.028</b>     | 0.5 (0.3-1)              | 0.053            | 0.7 (0.4-1.3)            | 0.265        | 0.6 (0.3-1.1)            | 0.113        |                          |                  |                          |                  |
| Sex=                                        | 1.3 (1-1.8)              | 0.053            | 1 (0.7-1.3)              | 0.878            | 1.2 (0.8-1.8)            | 0.307        | 1.1 (0.7-1.6)            | 0.777        | 0.9 (0.5-1.4)            | 0.511            | 0.8 (0.5-1.4)            | 0.486            |
| Histopathologic subtype<                    | 1.3 (1-1.8)              | 0.053            | 0.8 (0.5-1.3)            | 0.429            | 1.2 (0.8-1.8)            | 0.307        | 1.3 (0.6-2.5)            | 0.517        | 0.9 (0.5-1.4)            | 0.511            | 0.4 (0.2-0.8)            | <b>0.011</b>     |
| <b>rpS6 Expression*</b>                     | 1.7 (1.3-2.2)            | <b>&lt;0.001</b> | 1.6 (1.2-2.2)            | <b>0.001</b>     | 1.7 (1.2-2.4)            | <b>0.005</b> | 1.5 (1-2.3)              | <b>0.039</b> | 2.3 (1.5-3.4)            | <b>&lt;0.001</b> | 2.1 (1.4-3.2)            | <b>0.001</b>     |
| Karnofsky*                                  | 1.8 (1.4-2.4)            | <b>&lt;0.001</b> | 1.3 (1-1.8)              | <b>0.036</b>     | 1.3 (0.9-1.9)            | 0.101        | 1.3 (0.9-1.9)            | 0.208        | 1.3 (0.9-2)              | 0.157            | 1.6 (1.1-2.5)            | <b>0.029</b>     |
| Tumor extent <sup>o</sup>                   | 2.5 (1.9-3.3)            | <b>&lt;0.001</b> | 1.4 (1-1.9)              | <b>0.031</b>     | 1.4 (1-2)                | 0.079        | 1.4 (0.9-2.1)            | 0.12         | 1.8 (1.2-2.8)            | <b>0.009</b>     | 1.4 (0.9-2.3)            | 0.169            |
| Regional lymph node metastasis <sup>•</sup> | 2.8 (2-3.8)              | <b>&lt;0.001</b> | 1.2 (0.8-1.6)            | 0.4              | 1.5 (0.9-2.4)            | 0.129        | 1.5 (0.9-2.5)            | 0.132        | 1.2 (0.8-1.9)            | 0.385            | 0.8 (0.5-1.4)            | 0.489            |
| Distant metastasis <sup>‡</sup>             | 61.5 (35.7-)             | <b>&lt;0.001</b> | 57.9 (32.2-)             | <b>&lt;0.001</b> |                          |              |                          |              |                          |                  |                          |                  |
| Grade of malignancy <sup>⊗</sup>            | 2.9 (2.2-3.9)            | <b>&lt;0.001</b> | 1.4 (1-1.8)              | <b>0.048</b>     | 1.6 (1-2.3)              | <b>0.03</b>  | 1.2 (0.7-1.9)            | 0.517        | 1.8 (1.2-2.7)            | <b>0.003</b>     | 1.7 (1.1-2.6)            | <b>0.012</b>     |
| Type of surgery t                           | 2.3 (1.3-4)              | <b>0.007</b>     | 0.6 (0.3-1)              | 0.066            | 0.7 (0.4-1.3)            | 0.322        | 0.6 (0.3-1.1)            | 0.088        |                          |                  |                          |                  |
| Sex=                                        | 1.4 (1-1.8)              | <b>0.024</b>     | 1.1 (0.8-1.5)            | 0.521            | 1.3 (0.9-1.8)            | 0.24         | 1.1 (0.7-1.6)            | 0.722        | 1 (0.6-1.5)              | 0.98             | 1 (0.7-1.6)              | 0.956            |
| Histopathologic subtype<                    | 1.4 (1-1.8)              | <b>0.024</b>     | 0.8 (0.5-1.2)            | 0.284            | 1.3 (0.9-1.8)            | 0.24         | 1 (0.6-1.9)              | 0.939        | 1 (0.6-1.5)              | 0.98             | 0.5 (0.3-0.9)            | <b>0.03</b>      |
| <b>p-rpS6 Expression*</b>                   | 1.5 (1.1-2)              | <b>0.006</b>     | 1.2 (0.9-1.6)            | 0.352            | 1.2 (0.8-1.8)            | 0.268        | 1 (0.7-1.5)              | 0.965        | 1.6 (1.1-2.5)            | <b>0.025</b>     | 1.6 (1-2.5)              | <b>0.032</b>     |
| Karnofsky*                                  | 1.9 (1.4-2.4)            | <b>&lt;0.001</b> | 1.4 (1.1-1.8)            | <b>0.018</b>     | 1.4 (1-1.9)              | 0.067        | 1.4 (1-2)                | 0.076        | 1.2 (0.8-1.8)            | 0.289            | 1.5 (1-2.3)              | 0.063            |
| Tumor extent <sup>o</sup>                   | 2.4 (1.8-3.1)            | <b>&lt;0.001</b> | 1.4 (1-1.8)              | <b>0.043</b>     | 1.4 (1-1.9)              | 0.075        | 1.4 (0.9-2)              | 0.127        | 1.7 (1.1-2.5)            | <b>0.023</b>     | 1.4 (0.9-2.2)            | 0.168            |
| Regional lymph node metastasis <sup>•</sup> | 2.5 (1.8-3.4)            | <b>&lt;0.001</b> | 1.2 (0.8-1.7)            | 0.318            | 1.2 (0.8-2)              | 0.38         | 1.2 (0.7-2.1)            | 0.417        | 1.4 (0.9-2.2)            | 0.107            | 0.9 (0.5-1.4)            | 0.55             |
| Distant metastasis <sup>‡</sup>             | 56.8 (34.2-)             | <b>&lt;0.001</b> | 51.6 (30.1-)             |                  |                          |              |                          |              |                          |                  |                          |                  |
| Grade of malignancy <sup>⊗</sup>            | 2.7 (2.1-3.5)            | <b>&lt;0.001</b> | 1.5 (1.2-2.1)            | <b>0.003</b>     | 1.5 (1-2.2)              | 0.055        | 1.4 (0.9-2.1)            | 0.16         | 2 (1.3-2.9)              | <b>0.001</b>     | 2 (1.3-3)                | <b>0.001</b>     |
| Type of surgery t                           | 1.7 (1-2.8)              | <b>0.046</b>     | 0.5 (0.3-0.8)            | <b>0.009</b>     | 0.6 (0.4-1.1)            | 0.087        | 0.5 (0.3-0.8)            | <b>0.01</b>  | 1.8 (0.3-)               | 0.546            | 0.8 (0.1-5.8)            | 0.792            |
| Sex=                                        | 1.4 (1-1.8)              | <b>0.029</b>     | 1 (0.8-1.4)              | 0.761            | 1.3 (0.9-1.9)            | 0.155        | 1.2 (0.8-1.7)            | 0.424        | 0.9 (0.6-1.3)            | 0.554            | 0.9 (0.6-1.4)            | 0.572            |
| Histopathologic subtype<                    | 1.4 (1-1.8)              | <b>0.029</b>     | 0.8 (0.5-1.2)            | 0.2              | 1.3 (0.9-1.9)            | 0.155        | 1 (0.6-1.8)              | 0.961        | 0.9 (0.6-1.3)            | 0.554            | 0.4 (0.2-0.8)            | <b>0.008</b>     |

**Suppl. Tab. 4: Uni- and multivariate analyses of rpS6 and p-rpS6 expression and clinical/pathologic features for the prediction of cancer specific survival in patient with localized or metastasized RCCs.**

|                                             | M0                       |                  |                          |                  | M1                       |                  |                          |                  |
|---------------------------------------------|--------------------------|------------------|--------------------------|------------------|--------------------------|------------------|--------------------------|------------------|
|                                             | Univariate Analysis      |                  | Multivariate Analysis    |                  | Univariate Analysis      |                  | Multivariate Analysis    |                  |
|                                             | Hazard Ratio<br>(95% CI) | p                | Hazard Ratio<br>(95% CI) | p                | Hazard Ratio<br>(95% CI) | p                | Hazard Ratio<br>(95% CI) | p                |
| <b>rpS6 + p-rpS6 Expression *</b>           | 1.7 (1.1-2.6)            | <b>0.009</b>     | 1.9 (1.2-2.9)            | <b>0.007</b>     | 2.4 (1.5-3.7)            | <b>&lt;0.001</b> | 2.4 (1.6-3.9)            | <b>&lt;0.001</b> |
| Karnofsky*                                  | 2.4 (1.6-3.6)            | <b>&lt;0.001</b> | 1.9 (1.2-2.9)            | <b>0.003</b>     | 1.2 (0.8-1.9)            | 0.378            | 1.4 (0.9-2.2)            | 0.17             |
| Tumor extent <sup>o</sup>                   | 6.1 (4-9.3)              | <b>&lt;0.001</b> | 4.6 (2.8-7.3)            | <b>&lt;0.001</b> | 1.8 (1.1-2.8)            | <b>0.02</b>      | 1.5 (0.9-2.5)            | 0.122            |
| Regional lymph node metastasis <sup>•</sup> | 9.9 (5.6-17.3)           | <b>&lt;0.001</b> | 5.2 (2.9-9.2)            | <b>&lt;0.001</b> | 1.5 (0.9-2.3)            | 0.115            | 0.8 (0.5-1.4)            | 0.395            |
| Grade of malignancy <sup>⊗</sup>            | 4.9 (3.1-7.8)            | <b>&lt;0.001</b> | 1.7 (1-2.9)              | <b>0.042</b>     | 1.9 (1.2-2.9)            | <b>0.003</b>     | 1.8 (1.2-2.9)            | <b>0.009</b>     |
| Type of surgery t                           | 2.5 (1.2-5.4)            | <b>0.019</b>     | 1.5 (0.7-3.3)            | 0.344            |                          |                  |                          |                  |
| Sex=                                        | 1.7 (1.1-2.7)            | <b>0.012</b>     | 1.5 (1-2.4)              | 0.065            | 0.9 (0.5-1.4)            | 0.511            | 0.8 (0.5-1.4)            | 0.486            |
| Histopathologic subtype<                    | 1.7 (1.1-2.7)            | <b>0.012</b>     | 1.9 (0.9-4.2)            | 0.107            | 0.9 (0.5-1.4)            | 0.511            | 0.4 (0.2-0.8)            | <b>0.011</b>     |
| <b>rpS6 Expression *</b>                    | 1.8 (1.2-2.7)            | <b>0.003</b>     | 1.6 (1.1-2.5)            | <b>0.028</b>     | 2.3 (1.5-3.4)            | <b>&lt;0.001</b> | 2.1 (1.4-3.2)            | <b>0.001</b>     |
| Karnofsky*                                  | 2.2 (1.5-3.3)            | <b>&lt;0.001</b> | 1.7 (1.1-2.6)            | <b>0.009</b>     | 1.3 (0.9-2)              | 0.157            | 1.6 (1.1-2.5)            | <b>0.029</b>     |
| Tumor extent <sup>o</sup>                   | 6.3 (4.2-9.4)            | <b>&lt;0.001</b> | 3.9 (2.5-6.2)            | <b>&lt;0.001</b> | 1.8 (1.2-2.8)            | <b>0.009</b>     | 1.4 (0.9-2.3)            | 0.169            |
| Regional lymph node metastasis <sup>•</sup> | 8.5 (5-14.4)             | <b>&lt;0.001</b> | 4 (2.3-6.9)              | <b>&lt;0.001</b> | 1.2 (0.8-1.9)            | 0.385            | 0.8 (0.5-1.4)            | 0.489            |
| Grade of malignancy <sup>⊗</sup>            | 5.7 (3.7-8.7)            | <b>&lt;0.001</b> | 2.3 (1.4-3.8)            | <b>0.001</b>     | 1.8 (1.2-2.7)            | <b>0.003</b>     | 1.7 (1.1-2.6)            | <b>0.012</b>     |
| Type of surgery t                           | 2.7 (1.3-5.5)            | <b>0.007</b>     | 1.3 (0.6-2.8)            | 0.509            |                          |                  |                          |                  |
| Sex=                                        | 1.7 (1.1-2.6)            | <b>0.01</b>      | 1.7 (1.1-2.6)            | <b>0.018</b>     | 1 (0.6-1.5)              | 0.98             | 1 (0.7-1.6)              | 0.956            |
| Histopathologic subtype<                    | 1.7 (1.1-2.6)            | <b>0.01</b>      | 1.8 (0.9-3.8)            | 0.103            | 1 (0.6-1.5)              | 0.98             | 0.5 (0.3-0.9)            | <b>0.03</b>      |
| <b>p-rpS6 Expression *</b>                  | 1.9 (1.2-2.8)            | <b>0.003</b>     | 1.4 (0.9-2.1)            | 0.152            | 1.6 (1.1-2.5)            | <b>0.025</b>     | 1.6 (1-2.5)              | <b>0.032</b>     |
| Karnofsky*                                  | 2 (1.4-3)                | <b>&lt;0.001</b> | 1.9 (1.3-2.8)            | <b>0.001</b>     | 1.2 (0.8-1.8)            | 0.289            | 1.5 (1-2.3)              | 0.063            |
| Tumor extent <sup>o</sup>                   | 6.2 (4.2-9.2)            | <b>&lt;0.001</b> | 4.3 (2.8-6.7)            | <b>&lt;0.001</b> | 1.7 (1.1-2.5)            | <b>0.023</b>     | 1.4 (0.9-2.2)            | 0.168            |
| Regional lymph node metastasis <sup>•</sup> | 9.5 (5.8-15.7)           | <b>&lt;0.001</b> | 4.8 (2.9-8.2)            | <b>&lt;0.001</b> | 1.4 (0.9-2.2)            | 0.107            | 0.9 (0.5-1.4)            | 0.55             |
| Grade of malignancy <sup>⊗</sup>            | 4.8 (3.2-7.2)            | <b>&lt;0.001</b> | 1.9 (1.2-3.1)            | <b>0.005</b>     | 2 (1.3-2.9)              | <b>0.001</b>     | 2 (1.3-3)                | <b>0.001</b>     |
| Type of surgery t                           | 2 (1.1-3.8)              | <b>0.026</b>     | 1 (0.5-1.9)              | 0.91             | 1.8 (0.3-13.2)           | 0.546            | 0.8 (0.1-5.8)            | 0.792            |
| Sex=                                        | 1.9 (1.2-2.8)            | <b>0.003</b>     | 1.7 (1.1-2.6)            | <b>0.013</b>     | 0.9 (0.6-1.3)            | 0.554            | 0.9 (0.6-1.4)            | 0.572            |
| Histopathologic subtype<                    | 1.9 (1.2-2.8)            | <b>0.003</b>     | 1.7 (0.9-3.3)            | 0.106            | 0.9 (0.6-1.3)            | 0.554            | 0.4 (0.2-0.8)            | <b>0.008</b>     |

\*Immunohistochemical intensity high vs. low

\* <80% vs >= 80%

<sup>o</sup>pT3/pT4 vs pT1/pT2

<sup>•</sup>pN1/pN2 vs pN0/N0

± M1 vs M0

⊗G3/G4 vs G1/G2

= Male vs female

t Radical vs partial nephrectomy

< Clear-cell vs non-clear-cell

Suppl. Tab. 5: Comparison of rps6 / p-rps6 expression levels and clinical and pathologic features in patients with ccRCC.

|                            | M0+M1    |          |       |          |          |        | M0      |          |       |         |          |        | M1      |         |      |         |         |       |
|----------------------------|----------|----------|-------|----------|----------|--------|---------|----------|-------|---------|----------|--------|---------|---------|------|---------|---------|-------|
|                            | rps6     |          | p     | p-rps6   |          | p      | rps6    |          | p     | p-rps6  |          | p      | rps6    |         | p    | p-rps6  |         | p     |
|                            | high     | low      |       | high     | low      |        | high    | low      |       | high    | low      |        | high    | low     |      | high    | low     |       |
|                            | 150 (31) | 336 (69) |       | 102 (21) | 394 (79) |        | 113     | 273 (71) |       | 74 (19) | 324 (81) |        | 37 (37) | 63 (63) |      | 28 (29) | 70 (71) |       |
| <b>Sex</b>                 |          |          | 0.921 |          |          | 0.57   |         |          | 0.822 |         |          | 1      |         |         | 1    |         |         | 0.458 |
| Male                       | 89 (18)  | 201 (41) |       | 65 (13)  | 238 (48) |        | 63 (16) | 156 (40) |       | 43 (11) | 190 (48) |        | 26 (26) | 45 (45) |      | 22 (22) | 48 (49) |       |
| Female                     | 61 (13)  | 135 (28) |       | 37 (7)   | 156 (31) |        | 50 (13) | 117 (30) |       | 31 (8)  | 134 (34) |        | 11 (11) | 18 (18) |      | 6 (6)   | 22 (22) |       |
| <b>Age at surgery (y)</b>  |          |          | 1     |          |          | 0.65   |         |          | 0.57  |         |          | 0.895  |         |         | 0.39 |         |         | 0.645 |
| <65                        | 91 (19)  | 204 (42) |       | 60 (12)  | 242 (49) |        | 65 (17) | 166 (43) |       | 44 (11) | 197 (49) |        | 26 (26) | 38 (38) |      | 16 (16) | 45 (46) |       |
| >=65                       | 59 (12)  | 132 (27) |       | 42 (8)   | 152 (31) |        | 48 (12) | 107 (28) |       | 30 (8)  | 127 (32) |        | 11 (11) | 25 (25) |      | 12 (12) | 25 (26) |       |
| <b>Karnofsky index</b>     |          |          | 0.023 |          |          | <0.001 |         |          | 0.014 |         |          | <0.001 |         |         | 0.83 |         |         | 0.65  |
| >=1                        | 63 (13)  | 105 (22) |       | 55 (11)  | 123 (25) |        | 43 (11) | 69 (18)  |       | 37 (9)  | 83 (21)  |        | 20 (20) | 36 (36) |      | 18 (18) | 40 (41) |       |
| <1                         | 87 (18)  | 231 (48) |       | 47 (9)   | 271 (55) |        | 70 (18) | 204 (53) |       | 37 (9)  | 241 (61) |        | 17 (17) | 27 (27) |      | 10 (10) | 30 (31) |       |
| <b>Tumor extent</b>        |          |          | 0.055 |          |          | 0.011  |         |          | 0.547 |         |          | 0.162  |         |         | 0.05 |         |         | 0.113 |
| pT1/2                      | 84 (17)  | 219 (45) |       | 53 (11)  | 260 (52) |        | 76 (20) | 192 (50) |       | 46 (12) | 230 (58) |        | 8 (8)   | 27 (27) |      | 7 (7)   | 30 (31) |       |
| pT3/4                      | 66 (14)  | 117 (24) |       | 49 (10)  | 134 (27) |        | 37 (10) | 81 (21)  |       | 28 (7)  | 94 (24)  |        | 29 (29) | 36 (36) |      | 21 (21) | 40 (41) |       |
| <b>Regional lymph</b>      |          |          | 0.021 |          |          | 0.002  |         |          | 0.282 |         |          | 0.023  |         |         | 0.13 |         |         | 0.165 |
| N0/pN0                     | 131 (27) | 315 (65) |       | 87 (18)  | 373 (75) |        | 106     | 263 (68) |       | 67 (17) | 314 (79) |        | 25 (25) | 52 (52) |      | 20 (20) | 59 (60) |       |
| pN1, pN2                   | 19 (4)   | 21 (4)   |       | 15 (3)   | 21 (4)   |        | 7 (2)   | 10 (3)   |       | 7 (2)   | 10 (3)   |        | 12 (12) | 11 (11) |      | 8 (8)   | 11 (11) |       |
| <b>Distant metastasis</b>  |          |          | 0.146 |          |          | 0.036  |         |          |       |         |          |        |         |         |      |         |         |       |
| M0                         | 113 (23) | 273 (56) |       | 74 (15)  | 324 (65) |        |         |          |       |         |          |        |         |         |      |         |         |       |
| M1                         | 37 (8)   | 63 (13)  |       | 28 (6)   | 70 (14)  |        |         |          |       |         |          |        |         |         |      |         |         |       |
| <b>Grade of malignancy</b> |          |          | 0.007 |          |          | 0.001  |         |          | 0.037 |         |          | 0.006  |         |         | 0.40 |         |         | 0.263 |
| G1/2                       | 112 (23) | 286 (59) |       | 71 (14)  | 334 (67) |        | 93 (24) | 247 (64) |       | 57 (14) | 290 (73) |        | 19 (19) | 39 (39) |      | 14 (14) | 44 (45) |       |
| G3/4                       | 38 (8)   | 50 (10)  |       | 31 (6)   | 60 (12)  |        | 20 (5)  | 26 (7)   |       | 17 (4)  | 34 (9)   |        | 18 (18) | 24 (24) |      | 14 (14) | 26 (27) |       |
| <b>Type of surgery</b>     |          |          | 0.003 |          |          | 1      |         |          | 0.001 |         |          | 0.734  |         |         |      |         |         | 1     |
| Radical                    | 118 (24) | 300 (62) |       | 88 (18)  | 338 (68) |        | 81 (21) | 237 (61) |       | 60 (15) | 269 (68) |        |         |         |      | 28 (29) | 69 (70) |       |
| Partial                    | 32 (7)   | 36 (7)   |       | 14 (3)   | 56 (11)  |        | 32 (8)  | 36 (9)   |       | 14 (4)  | 55 (14)  |        |         |         |      | 0 (0)   | 1 (1)   |       |

**Suppl. Tab. 6: Uni- and multivariate analyses of rpS6 and p-rpS6 expression and clinical/pathologic features for the prediction of cancer specific survival in patients with ccRCCs.**

|                                 | M0+M1                    |                  |                          |                  | M0                       |                  |                          |                  | M1                       |              |                          |              |
|---------------------------------|--------------------------|------------------|--------------------------|------------------|--------------------------|------------------|--------------------------|------------------|--------------------------|--------------|--------------------------|--------------|
|                                 | Univariate Analysis      |                  | Multivariate Analysis    |                  | Univariate Analysis      |                  | Multivariate Analysis    |                  | Univariate Analysis      |              | Multivariate Analysis    |              |
|                                 | Hazard Ratio<br>(95% CI) | p                | Hazard Ratio<br>(95% CI) | p                | Hazard Ratio<br>(95% CI) | p                | Hazard Ratio<br>(95% CI) | p                | Hazard Ratio<br>(95% CI) | p            | Hazard Ratio<br>(95% CI) | p            |
| <b>rpS6 + p-rps6</b>            | 1.8 (1.3-2.5)            | <b>&lt;0.001</b> | 1.8 (1.3-2.5)            | <b>&lt;0.001</b> | 1.9 (1.2-2.9)            | <b>0.003</b>     | 1.7 (1-2.7)              | <b>0.033</b>     | 2.2 (1.4-3.4)            | <b>0.001</b> | 2.3 (1.4-3.7)            | <b>0.001</b> |
| Karnofsky*                      | 2.6 (1.9-3.5)            | <b>&lt;0.001</b> | 1.6 (1.2-2.3)            | <b>0.003</b>     | 2.2 (1.4-3.3)            | <b>&lt;0.001</b> | 1.9 (1.2-2.9)            | <b>0.007</b>     | 1.3 (0.8-2.1)            | 0.253        | 1.3 (0.8-2.1)            | 0.346        |
| Tumor extent°                   | 5.1 (3.7-7.1)            | <b>&lt;0.001</b> | 2.9 (2-4.2)              | <b>&lt;0.001</b> | 6 (3.8-9.3)              | <b>&lt;0.001</b> | 4.8 (2.9-7.9)            | <b>&lt;0.001</b> | 1.7 (1.1-2.8)            | <b>0.03</b>  | 1.6 (0.9-2.7)            | 0.103        |
| Regional lymph node metastasis• | 5.7 (3.8-8.5)            | <b>&lt;0.001</b> | 1.5 (1-2.3)              | 0.072            | 8.1 (4.5-14.5)           | <b>&lt;0.001</b> | 4.8 (2.6-8.7)            | <b>&lt;0.001</b> | 1.4 (0.8-2.4)            | 0.219        | 0.8 (0.4-1.5)            | 0.517        |
| Distant metastasis ±            | 8.9 (6.4-12.3)           | <b>&lt;0.001</b> |                          |                  |                          |                  |                          |                  |                          |              |                          |              |
| Grade of malignancy ⊗           | 4.4 (3.2-6.2)            | <b>&lt;0.001</b> | 1.6 (1.1-2.3)            | <b>0.007</b>     | 4.3 (2.6-7)              | <b>&lt;0.001</b> | 1.7 (1-2.9)              | 0.052            | 1.7 (1.1-2.6)            | <b>0.03</b>  | 1.7 (1-2.7)              | <b>0.044</b> |
| Type of surgery t               | 3.6 (1.7-7.7)            | 0.001            | 1.6 (0.7-3.5)            | 0.264            | 2.1 (1-4.5)              | <b>0.066</b>     | 1.2 (0.5-2.7)            | 0.695            |                          |              |                          |              |
| Sex=                            | 1.8 (1.3-2.5)            | 0.001            | 1.3 (1-1.9)              | 0.095            | 1.8 (1.1-2.8)            | <b>0.012</b>     | 1.4 (0.9-2.3)            | 0.13             | 1 (0.6-1.6)              | 0.913        | 0.9 (0.5-1.5)            | 0.635        |
| <b>rpS6 Expression *</b>        | 1.9 (1.4-2.5)            | <b>&lt;0.001</b> | 1.7 (1.3-2.3)            | <b>0.001</b>     | 1.9 (1.2-2.8)            | <b>0.003</b>     | 1.4 (0.9-2.2)            | 0.138            | 2.1 (1.3-3.2)            | <b>0.001</b> | 2.1 (1.3-3.4)            | <b>0.001</b> |
| Karnofsky*                      | 2.4 (1.8-3.3)            | <b>&lt;0.001</b> | 1.7 (1.3-2.3)            | <b>0.001</b>     | 2.1 (1.4-3.1)            | <b>&lt;0.001</b> | 1.7 (1.1-2.6)            | <b>0.012</b>     | 1.4 (0.9-2.2)            | 0.119        | 1.4 (0.9-2.2)            | 0.121        |
| Tumor extent°                   | 5.3 (3.9-7.3)            | <b>&lt;0.001</b> | 2.9 (2-4.1)              | <b>&lt;0.001</b> | 6 (3.9-9.2)              | <b>&lt;0.001</b> | 4.2 (2.6-6.7)            | <b>&lt;0.001</b> | 1.9 (1.2-3)              | <b>0.01</b>  | 1.6 (1-2.7)              | 0.062        |
| Regional lymph node metastasis• | 5 (3.4-7.2)              | <b>&lt;0.001</b> | 1.2 (0.8-1.9)            | 0.314            | 7.2 (4.1-12.6)           | <b>&lt;0.001</b> | 3.7 (2.1-6.5)            | <b>&lt;0.001</b> | 1.1 (0.7-1.9)            | 0.597        | 0.7 (0.4-1.3)            | 0.294        |
| Distant metastasis ±            | 8.7 (6.4-11.9)           | <b>&lt;0.001</b> | 4.6 (3.2-6.5)            | <b>&lt;0.001</b> |                          |                  |                          |                  |                          |              |                          |              |
| Grade of malignancy ⊗           | 4.9 (3.6-6.6)            | <b>&lt;0.001</b> | 1.8 (1.3-2.5)            | <b>0.001</b>     | 4.9 (3.1-7.7)            | <b>&lt;0.001</b> | 2.3 (1.4-3.8)            | <b>0.002</b>     | 1.7 (1.1-2.6)            | <b>0.017</b> | 1.7 (1.1-2.7)            | <b>0.02</b>  |
| Type of surgery t               | 4 (2-8.1)                | <b>&lt;0.001</b> | 1.5 (0.7-3.3)            | 0.254            | 2.3 (1.1-4.7)            | <b>0.027</b>     | 1.1 (0.5-2.3)            | 0.875            |                          |              |                          |              |
| Sex=                            | 1.9 (1.3-2.5)            | <b>&lt;0.001</b> | 1.6 (1.1-2.2)            | <b>0.009</b>     | 1.9 (1.2-2.9)            | <b>0.005</b>     | 1.7 (1.1-2.6)            | <b>0.027</b>     | 1.1 (0.7-1.8)            | 0.667        | 1.1 (0.7-1.8)            | 0.73         |
| <b>p-rpS6 Expression *</b>      | 1.9 (1.4-2.6)            | <b>&lt;0.001</b> | 1.4 (1-1.9)              | 0.052            | 1.9 (1.2-2.9)            | <b>0.004</b>     | 1.3 (0.8-2.1)            | 0.228            | 1.6 (1-2.4)              | 0.059        | 1.6 (1-2.6)              | 0.066        |
| Karnofsky*                      | 2.3 (1.8-3.1)            | <b>&lt;0.001</b> | 1.7 (1.2-2.2)            | <b>0.001</b>     | 1.9 (1.3-2.8)            | <b>0.001</b>     | 1.8 (1.2-2.8)            | <b>0.005</b>     | 1.3 (0.9-2.1)            | 0.181        | 1.4 (0.9-2.2)            | 0.133        |
| Tumor extent°                   | 4.9 (3.7-6.7)            | <b>&lt;0.001</b> | 2.7 (1.9-3.8)            | <b>&lt;0.001</b> | 5.7 (3.8-8.6)            | <b>&lt;0.001</b> | 4.4 (2.7-7)              | <b>&lt;0.001</b> | 1.6 (1-2.6)              | <b>0.035</b> | 1.4 (0.9-2.3)            | 0.173        |
| Regional lymph node metastasis• | 5.5 (3.8-7.9)            | <b>&lt;0.001</b> | 1.6 (1-2.4)              | <b>0.038</b>     | 7.5 (4.4-12.9)           | <b>&lt;0.001</b> | 4.2 (2.4-7.3)            | <b>&lt;0.001</b> | 1.4 (0.8-2.3)            | 0.234        | 0.9 (0.5-1.7)            | 0.767        |
| Distant metastasis ±            | 9.3 (6.9-12.6)           | <b>&lt;0.001</b> | 4.8 (3.4-6.8)            | <b>&lt;0.001</b> |                          |                  |                          |                  |                          |              |                          |              |
| Grade of malignancy ⊗           | 4.5 (3.3-6)              | <b>&lt;0.001</b> | 1.8 (1.3-2.5)            | <b>&lt;0.001</b> | 4.3 (2.8-6.6)            | <b>&lt;0.001</b> | 1.9 (1.2-3.1)            | <b>0.009</b>     | 1.7 (1.1-2.6)            | <b>0.011</b> | 1.7 (1.1-2.7)            | <b>0.017</b> |
| Type of surgery t               | 2.8 (1.6-5.1)            | <b>&lt;0.001</b> | 1 (0.6-1.9)              | 0.888            | 1.8 (0.9-3.3)            | 0.079            | 0.8 (0.4-1.6)            | 0.523            | 1.8 (0.2-                | 0.575        | 0.8 (0.1-6.5)            | 0.872        |
| Sex=                            | 1.8 (1.3-2.5)            | <b>&lt;0.001</b> | 1.5 (1.1-2)              | <b>0.021</b>     | 2 (1.3-3)                | <b>0.002</b>     | 1.7 (1.1-2.6)            | <b>0.017</b>     | 1 (0.6-1.5)              | 0.869        | 0.9 (0.6-1.5)            | 0.805        |
